# Supplementary material for: Is Lymphedema a Systemic Disease? A Paired Molecular and Histological Analysis of the Affected and Unaffected Tissue in Lymphedema Patients
Source: MDPI journal article supplement (doi:10.3390/biom12111667), 2022-11-11
Supplement: s1 [file s1]

## Supplementary

Suppl. Table S1: Lymphedema patient characteristics

Suppl. Table S2: Control patient characteristics

Suppl. Table S3: Primer List

Suppl. Figure S1:

Table S1: Lymphedema patient characteristics

| Patient LE | Age | Gender | Affected Limb | Matched-biopsy location | Etiology              | Clin. Stage | BMI (kg/m2) | FD (M/Y) |
|------------|-----|--------|---------------|-------------------------|-----------------------|-------------|-------------|----------|
| LE1        | 69  | F      | Left leg      | Right trunk/axilla      | Uterus Ca             | III-IV      | 29.8        | 2011     |
| LE2        | 64  | M      | Left leg      | Right trunk/axilla      | Melanoma              | II          | 31.4        | 2014     |
| LE3        | 66  | F      | Left leg      | Right trunk/axilla      | Endometrial Ca        | II          | 25.9        | 2007     |
| LE4        | 57  | F      | Left leg      | Right trunk/axilla      | Uterus Ca             | III         | 24.3        | 2014     |
| LE5        | 44  | M      | Left leg      | Right trunk/axilla      | Melanoma              | I           | 36          | 2017     |
| LE6        | 63  | F      | Right leg     | Left trunk/axilla       | Ovarial-Ca            | III         | 23.6        | 2018     |
| LE7        | 64  | F      | Left leg      | Right trunk/axilla      | Infection upon sectio | II          | 22          | 2003     |
| LE8        | 68  | F      | Left arm      | Right groin             | Mamma-Ca              | II          | 36.9        | 2019     |
| LE9        | 47  | F      | Left arm      | Right groin             | Mamma-Ca              | II          | 29          | 2013     |
| LE10       | 39  | F      | Right leg     | Left trunk/axilla       | Trauma                | II          | 21.3        | 2004     |

**Table S2: Control patient characteristics**

| <b>Patient C</b> | <b>Age</b> | <b>Gender</b> | <b>Location</b> | <b>Clin.<br/>Stage</b> | <b>BMI<br/>(kg/m2)</b> | <b>FD<br/>(M/Y)</b> |
|------------------|------------|---------------|-----------------|------------------------|------------------------|---------------------|
| C1               | 18         | F             | Thigh/ leg      | NA                     | 23                     | NA                  |
| C2               | 28         | M             | Abdomen/ groin  | NA                     | 24.9                   | NA                  |
| C3               | 53         | F             | Trunk           | NA                     | 22.4                   | NA                  |
| C4               | 48         | F             | Trunk           | NA                     | 25                     | NA                  |
| C5               | 51         | F             | Trunk           | NA                     | 26.8                   | NA                  |
| C6               | 57         | M             | Abdomen/ groin  | NA                     | 34.4                   | NA                  |
| C7               | 55         | M             | Abdomen/ groin  | NA                     | 32.9                   | NA                  |
| C8               | 27         | F             | Trunk           | NA                     | 35                     | NA                  |
| C9               | 45         | F             | Trunk           | NA                     | 22                     | NA                  |
| C10              | 16         | F             | Thigh/ leg      | NA                     | 19                     | NA                  |

**Table S3: Primer List**

|                |                          |
|----------------|--------------------------|
| B2M forward    | TGTGCTCGCGCTACTCTCTCT    |
| B2M reverse    | CGGATGGATGAAACCCAGACA    |
| VEGF A forward | CTACCTCCACCATGCCAAGT     |
| VEGF A reverse | GCAGTAGCTGCGCTGATAGA     |
| VEGF C forward | CACCACCAAACATGCAGCTG     |
| VEGF C reverse | TGAAAATCCTGGCTCACAAGC    |
| VEGF D forward | ATGGACCAGTGAAGCGATCAT    |
| VEGF C reverse | GTTCTCCAAACTAGAAGCAGC    |
| PDPN forward   | AGGCGGCGTTGCCAT          |
| PDPN reverse   | GTCTTCGCTGGTTCCTGGAG     |
| LYVE-1 forward | AGCTATGGCTGGGTTGGAGA     |
| LYVE-1 reverse | CCCCATTTTTCCCACACTTG     |
| PROX1 forward  | ACAAAAATGGTGGCACGGA      |
| PROX1 reverse  | CCTGATGTACTTCGGAGCCTG    |
| CD4 forward    | CCTCCTGCTTTTCATTGGGCTAGG |
| CD4 reverse    | TGAGGACACTGGCAGGTCTTCT   |
| CD45 forward   | CTTCAGTGGTCCCATTGTGGTG   |
| CD45 reverse   | CCACTTTGTTCTCGGCTTCCAG   |
| CD68 forward   | CGAGCATCATTCTTTCACCAGCT  |
| CD68 reverse   | ATGAGAGGCAGCAAGATGGACC   |

## Suppl. Figure S1:

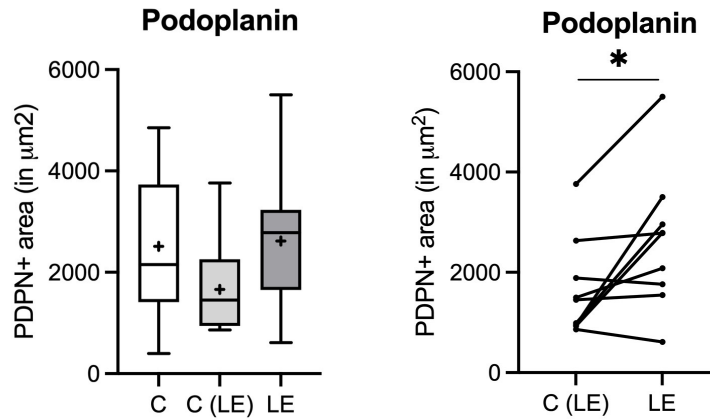

Figure S1: Histological evaluation of the lymphatic vessels on skin sections using podoplanin/PDPN revealed that the total lymphatic coverage in lymphedematous compared to the non-lymphedematous tissue from lymphedema patients is significantly increased. No alterations to the healthy control was detected. Asterisks indicate statistical significance; \* $P < 0.05$  (For the comparison to the healthy control and ANOVA followed by a Fischer's LSD test was used. For the comparison of the edematous and the non-edematous tissue from the same patient, a paired Student's t-test was used). C: Control, C(LE): control from non-lymphedematous tissue from lymphedema patients, LE: lymphedematous tissue
